# Supplementary material
Source: MDPI journal article supplement (https://www.mdpi.com/2077-0383/13/2/378)
Supplement: s1 [file s1]

### **Items included in the emotional intelligence subscales of the TEIQUE scale**

Instruction: Please indicate the degree of agreement or disagreement with the following statements. Answer options: 1: absolutely disagree- 7: absolutely agree

#### **Self-motivation**

- 1.- On the whole, I'm a highly motivated person (En general soy una persona con alta motivación)
- 2.- Sometimes, it feels like I'm producing a lot of good work effortlessly (Me cuesta trabajo esforzarme ante una tarea)
- 3.- I normally find it difficult to keep myself motivated (Me cuesta motivarme por lo que hago)
- 4.- I tend to get a lot of pleasure just from doing something well (Tiendo a obtener una gran satisfacción simplemente con hacer algo bien)
- 5.- I lose interest in what I do quite easily (Suelo perder interés por lo que hago)

#### **Emotion regulation**

- 1.- I tend to get "carried away" easily (Tiendo a enfadarme o exaltarme con facilidad)
- 2.- I usually find it difficult to regulate my emotions (Me cuesta controlar mis emociones)
- 3.- I'm usually able to calm down quickly after I've got mad at someone (Suelo calmarme con rapidez después de haberme enfadado con alguien)
- 4.- I'm usually able to find ways to control my emotions when I want to (Puedo encontrar diferentes maneras de controlar mis emociones cuando lo deseo)
- 5.- I know how to snap out my negative moods (Sé cómo animarme cuando me siento mal)
- 6.- When someone offends me, I'm usually able to remain calm (Cuando alguien me ofende soy capaz de mantener la calma)

#### **Emotion perception**

- 1.- I often find it difficult to recognize what emotion I am feeling (Me cuesta reconocer mis propias emociones)

2.- I'm never really sure what I'm feeling (Nunca estoy realmente seguro/a de lo que estoy sintiendo)

3.- Many times, I can't figure out what emotion I'm feeling (Muchas veces no consigo tener claro qué emoción estoy sintiendo)

4.- On the whole, I find it difficult to describe my feelings (En general me resulta difícil describir mis sentimientos)

5.- Most of the time, I know exactly why I feel the way I do (La mayoría de las veces sé exactamente por qué siento lo que estoy sintiendo en ese momento)

### **Assertiveness**

1.- When I disagree with someone, I usually find it easy to say so (Cuando estoy en desacuerdo con alguien me resulta fácil decirlo)

2.- I tend to "back down" even if I know I'm right (En una discusión tiendo a ceder incluso cuando sé que estoy en lo cierto)

3.- I usually find it difficult to express myself clearly (Me resulta difícil expresarme con claridad)

4.- I would normally defend my opinions even if it meant arguing with important people (Normalmente defiendiendo mis opiniones incluso si tengo que discutir con gente importante)

5.- I tend to speak well and clearly (Tiendo a hablar bien y claramente)

6.- I often find it difficult to stand up for my rights (En muchas ocasiones me resulta difícil defender mis derechos)
